# Supplementary material
Source: publisher figshare collection journal article supplement (https://gsapubs.figshare.com/ndownloader/files/23303345)
Supplement: Supplementary file 1 [file 23303345]

## Location, location, location: The variable lifespan of the Laramide orogeny

Copeland et al.

### 1 **Methods**

2     **Palinspastic restoration.** All points shown on Figs. 1 and 3 are displayed in their  
3 approximate locations at 25 Ma. Points not shown in their modern locations are those from the  
4 Basin and Range province, Baja California, and California (Fig. DR1). This reconstruction was  
5 achieved in seven steps: 1) Translation of Baja California (area in green in Fig. DR1) in a SSE  
6 direction so as to close the Gulf of California. 2) Translation of the area in California west of the  
7 San Andreas fault (black) SE-ward (parallel to the SAF) by 260 km (Crowell, 1962). 3)  
8 Squeezing of the Colorado extensional corridor (brown) in an E-W direction (holding the eastern  
9 margin fixed) by 15% (Howard and John, 1987; Davis and Lister, 1988). 4) Squeezing of the  
10 southern Basin and Range province of southern Arizona and southern New Mexico in an E-W  
11 direction (holding the eastern margin fixed) by 20% (Dickinson, 1991). 5) Squeezing of the  
12 Great Basin region (red) in an E-W direction (holding the eastern margin fixed) by 30% (Coney  
13 and Harms, 1984). 6) Translation of the modified Mojave desert region to the east such that it  
14 contacts the western portion of the modified southern Basin and Range region and the southern  
15 portion of the modified Great Basin region. 7) Rotation of points previously in eastern and  
16 northern California east of the San Andreas fault (purple and white, respectively) and the  
17 previously translated region originally west of the SAF (black) about a pole in southern  
18 California such that purple and white regions contacts the modified Great Basin region.

19     **Line of projection.** Collapsing the data in Fig. 1A onto a line to show the age-distance

relationship is very much the treatment as presented in the classic paper by Coney and Reynolds (1977) however we think this updated version of this analysis offers three advantages over the original. Firstly, the presentation of Coney and Reynolds (1977) was based on a large proportion of K-Ar ages. This was what was available at the time but the intervening decades have produced a large number of U-Pb and  $^{40}\text{Ar}/^{39}\text{Ar}$  ages, which are more reliable in estimating the time of formation of these rocks. Secondly, the data of Coney and Reynolds came mostly from New Mexico and Arizona but Fig. 1 shows data from a much broader area. Thirdly, the line of projection used by Coney and Reynolds was almost E-W in orientation but our line, with a bearing of about 045 (Fig. 1B), better approximates the vector of Farallon-North America convergence. The actual FA-NA direction of convergence varied from ~020 to 070 from 90 to 30 Ma (Saleeby, 2003; Yonkee and Weil, 2015) so 045 is the approximate average direction. Moreover, we find that for lines of projection with orientations from 045 to 055 the apparent rate of passage of the CSR and the apparent rate of the northwestward translation of the eastern edge of the Laramide deforming zone are closer to each other than for lines of projection with other orientations. Rates obtained using this line of projection may be less than the total convergence rate between FA and NA.

**Numerical modeling.** Our two-dimensional numerical model investigates subduction below the western United States from 90 to 30 Ma, using plate velocities and lithosphere structures consistent with those of the Farallon and North America Plates during this time. The modeling procedure follows that of Liu and Currie (2016). Plate convergence is imposed through boundary conditions and the oceanic plate geometry evolves dynamically within the model domain. The coupled thermal-mechanical evolution of the subduction zone is calculated with the finite-element code SOPALE (Fullsack, 1995). Arbitrary Lagrangian-Eulerian techniques are used to

solve the equations of force balance, conservation of mass, and conservation of energy for incompressible creeping (Stokes) flow, assuming incompressibility and subject to plane-strain conditions and the assigned boundary conditions and material properties. The energy equation includes terms for strain heating and a temperature correction for adiabatic heating (Currie and Beaumont, 2011).

The model represents a vertical cross-section along profile A-A' (Figure 1), with the initial model geometry shown in Fig. DR2. The model domain is 4000 km wide and 900 km deep and consists of an oceanic plate that converges with a continental plate. The continental structure roughly reflects that of the western United States, with 120-km-thick lithosphere adjacent to the plate margin and 200-km-thick lithosphere inboard (Liu and Currie, 2016). The oceanic plate is 90 km thick and has a thermal structure consistent with a plate age greater 70 m.y (Yonkee and Weil, 2015). An oceanic plateau, representing the conjugate Shatsky Rise (CSR), is placed within the oceanic plate 600 km outboard of the plate boundary. The plateau has a crustal thickness of 24 km and is 1000 km long, similar to the general structure of the Shatsky Rise in the northwest Pacific (Korenaga and Sager, 2012; Zhang et al., 2016). The lithosphere thickness for the plateau region is the same as that for normal oceanic crust.

Table DR1 gives the mechanical and thermal properties for the materials in the model. All materials have a temperature-dependent density and a viscous-plastic rheology. The plastic rheology follows a Druker-Prager yield criterion, and the viscous rheology corresponds to thermally-activated power-law creep, with parameters taken from laboratory experiments. A scaling factor is used to linearly increase or decrease the viscous strength relative to the laboratory samples as a way to account for strength variations due to minor changes in composition or water content (Beaumont et al., 2006). Material parameters follow those used in

previous studies (Liu and Currie, 2016; Beaumont et al., 2006). The sublithospheric mantle has a wet olivine dislocation creep rheology (Karato and Wu, 1993) to a depth of 660 km. Below this, the same flow law is used, and the effective viscosity is scaled upward by a factor of 5 to create a stronger lower mantle; we do not model the detailed phase changes within the mantle transition zone. The oceanic and continental mantle lithospheres are assumed to be relatively dry and thus their respective strengths are a factor of 5 and 10 times greater than the reference wet olivine. The larger factor for the continent reflects drier conditions that may be associated with cratonic lithosphere. For simplicity, the entire continental mantle lithosphere initially has the same viscous rheology.

Fig. DR2 shows the boundary conditions for the model domain. The top boundary is stress-free with a temperature of 0°C. The bottom boundary is a closed, free slip boundary with a temperature of 1657°C, corresponding to the mantle adiabat at 900 km depth. The side boundaries have no horizontal heat flux and no vertical slip. On the left boundary, oceanic lithosphere is introduced to the model domain at a prescribed rate (see below), and the incoming lithosphere has a prescribed temperature profile consistent with old (>70 m.y.) oceanic lithosphere. To maintain mass balance within the model domain, a uniform outflux is prescribed to the side boundaries of the sublithospheric mantle. Models are run in a continental reference frame by adding the continental velocity to all side boundaries (Liu and Currie, 2016).

The model is initialized with a 2D thermal structure that is consistent with the thermal boundary conditions and material properties, and the oceanic and continental plates are brought into isostatic equilibrium. Following this, subduction is initiated by applying a velocity of 5 cm/yr to the oceanic plate. After 600 km of convergence, a well-developed steep-angle subduction zone is created. At this time, the oceanic plateau is adjacent to the trench. We take

89 this to represent a geological time of 90 Ma, in agreement with the inferred time of subduction of  
90 the CSR (Liu et al., 2010).

91 At this time, the plate velocities are modified to reflect the average margin-normal rates for  
92 the Farallon and North America plates from the Late Cretaceous to the Early Oligocene (Yonkee  
93 and Weil, 2015; Engebretson et al., 1984). From 90 Ma to 50 Ma, the oceanic and continental  
94 plates have velocities of 6 cm/yr and 4 cm/yr, respectively, resulting in a convergence rate of 10  
95 cm/yr. Starting at ~55-50 Ma, there was a slow-down in plate convergence and North America  
96 westward motion (Yonkee and Weil, 2015; Engebretson et al., 1984). In the model, this is  
97 approximated by decreasing the convergence rate to 7 cm/yr from 50 Ma to 40 Ma (5 cm/yr  
98 oceanic plate; 2 cm/yr continental plate), and then 5 cm/yr from 40 Ma to 30 Ma (3 cm/yr  
99 oceanic plate; 2 cm/yr continental plate).

100 The model includes a phase change from basalt to eclogite for the oceanic crust and the CSR  
101 crust, using the phase diagram of Hacker et al. (2003). This phase change results in an increased  
102 crustal density; no other properties are changed. A density increase of  $500 \text{ kg/m}^3$  is used, such  
103 that the eclogitized crust density is comparable to that observed in field studies (Austrheim et al.,  
104 1997) and it is  $120 \text{ kg/m}^3$  more dense than mantle at the same temperature. The reaction kinetics  
105 of the basalt-eclogite phase change are not well-constrained and depend on factors such as  
106 temperature and hydration (van Hunen et al., 2002). Geological observations show that the phase  
107 change may occur sluggishly, with examples of metastable basalt at conditions well within the  
108 eclogite field (Hacker, 1996; Austrheim et al., 1997).

109 In the model, normal-thickness oceanic crust undergoes densification once its pressure-  
110 temperature conditions are within the eclogite stability field, following the procedure of Warren  
111 et al. (2008) to maintain mass balance in model. Model experiments show that a delay in

densification of this material does not significantly affect the overall slab dynamics owing to the small thickness of this layer. On the other hand, the density of the CSR crust is the primary control on the development and removal of the flat slab segment. Previous geodynamic models show that basalt metastability is required in order for an oceanic plateau to remain buoyant enough to induce flat subduction (Liu and Currie, 2016; van Hunen et al., 2002; Arrial and Billen, 2013). In our model, the CSR basaltic remains metastable during subduction and it undergoes later densification, corresponding to a delayed eclogite phase change. Model experiments show that timing of the phase change—specifically, the time at which the plateau density exceeds that of mantle—controls the end of flat-slab subduction. Densification of the CSR crust is imposed from 58 to 48 Ma, assuming progressive eclogitization within the entire plateau crust. The timing of densification is chosen to match the geological observations (Figure 1B), and the duration is arbitrary but is consistent with the reaction rates from van Hunen et al. (2002). We speculate that the CSR crust was relatively water-poor and therefore the eclogite phase change was kinetically inhibited, allowing the crust to remain metastable after entering the eclogite stability field (Liu and Currie, 2016; Austrheim et al., 1997). The later onset of eclogitization may reflect the time at which there was sufficient water within the CSR crust to trigger the phase change. Dehydration reactions within the underlying oceanic mantle lithosphere (Currie and Beaumont, 2011) may provide the fluids for this.

Termination of flat subduction also requires that the flat-slab segment decouples from the continental mantle lithosphere and sinks. In our model, the continental mantle lithosphere is initially dry and thus is 10 times more viscous than the reference wet olivine under the same conditions. In order to allow decoupling and slab rollback, the continental mantle lithosphere must be weaker. Here, we assume that as the flat slab develops, fluids released from the slab

infiltrate the continental mantle lithosphere, causing it to weaken (Karato and Wu, 1993). Currie and Beaumont (2011) show that extensive continental hydration could arise from the breakdown of hydrous minerals in the Farallon mantle lithosphere. Widespread hydration of the western US lithosphere is also indicated by geophysical observations (Humphreys et al., 2003). An alternate idea is that the western part of the continent was initially hydrated and thus weak owing to the long history of subduction prior to the Late Cretaceous. In the model, weakening occurs from 75 Ma until 50 Ma (i.e., during flat-slab subduction). Weakening occurs through a linear decrease in viscosity by an order of magnitude over this time, corresponding to a transition from a dry to wet mantle lithosphere. Weakening affects the region of the continent that overlies the flat slab. For simplicity, the entire thickness of mantle lithosphere is weakened, but flat slab removal only affects the deepest part of the lithosphere.

We note that our two-dimensional model is a simplified representation of the three-dimensional world. For example, with the plane-strain assumption, all material must flow within the model plane. Therefore, the model does not address the three-dimensional slab geometry (i.e., the along-strike transition between normal subduction and the flat-slab section) nor how along-strike mantle flow may affect the rate of slab shallowing or rollback (van Hunen et al., 2002; Arrial and Billen, 2013). Slab strength and material movement oblique to the model plane may affect the rate at which the slab geometry changes. In particular, rollback of the flat slab may be easier in three dimensions, as mantle can flow around the edge of the slab. In addition, plate convergence is imposed through assigned boundary velocities, whereas tectonic plates are driven by forces arising from density variations. Subduction of a buoyant plateau reduces the overall negative buoyancy of the slab, which may result in a decrease in the convergence rate (Arrial and Billen, 2013). Arrial and Billen (2013) argue that this effect is most important where the along-

strike width of the plateau is a significant fraction of the subduction zone width. Saleeby (2003) and Liu et al. (2010) estimate that the along-strike width of the CSR was ~500 km, which is less than 10% of the length of the Cretaceous subduction zone of western North America. Therefore, we follow previous studies (van Hunen et al., 2002; Arrial and Billen, 2013) in assuming that continued plate convergence was driven mostly by forces acting on the slab to the north and south of the model profile, where no plateau was subducted.

An animation of our model is given in Movie DR1. In the plots, the CSR crust changes color as it enters the eclogite stability field, but as noted above, we assume that it remains metastable until 58 Ma. The model demonstrates how the development of flat-slab subduction is consistent with subduction of metastable, and thus buoyant, oceanic plateau crust. Removal of the flat slab commences at ~55 Ma, corresponding to the time at which the CSR crust density becomes greater than that of the mantle.

## **Data sources.**

Data for igneous rocks were obtained from the North American Volcanic and Intrusive Rock Database (NAVDAT; <http://www.navdat.org/>) from all US western states, the Mexican states of Baja California Norte, Baja California Sur, Sonora, Chihuahua, and Coahuila, and the Canadian provinces of British Columbia and Alberta. Data were curated to remove duplicates and any ages not determined by the U-Pb zircon or  $^{40}\text{Ar}/^{39}\text{Ar}$  methods. If U-Pb zircon data were available, we used that age. In the case where no U-Pb data were available and more than one  $^{40}\text{Ar}/^{39}\text{Ar}$  age was reported, we used only the age from the mineral with the highest closure temperature for Ar.

Estimates for the time of youngest marine sedimentation are from stratigraphic descriptions of the various areas; sources for these estimates are given in Table DR2. Locations where a



significant hiatus exists between the youngest marine strata and overlying non-marine were not included in the analysis.

Estimates for the timing of the initiation and the cessation of Laramide deformation come from a variety of data including stratigraphic, structural, thermochronologic, and geochemical observations. Structural data bracket the initiation or cessation of deformation by taking note of the age of deformed and undeformed rocks. Estimates of the age of deformation from stratigraphic data come from the age of the oldest strata for which isopachs suggest a Laramide depocenter adjacent to a Laramide uplift (Dickinson et al., 1988) and the presence of coarse-grained, non-marine sedimentation near a Laramide uplift (Dickinson et al., 1988; Cather, 2004), especially where conglomerate clasts indicate uplift and erosion of young pre-Laramide sedimentary units, possibly along steep basement-involved faults (Dickinson et al., 1988). Thermochronologic evidence is useful for determining when basement rocks were cooling rapidly. Evidence for an episode of rapid cooling does not necessarily mark the beginning of deformation. However, in some cases (e.g., Omar et al., 1994) it can be shown that the episode of rapid cooling was preceded by a long period of slow cooling. In such cases, the timing of acceleration of cooling can be reasonably ascribed to the initiation of shortening (or to a time slightly after the beginning of deformation). Sources and types of data for the initiation of deformation and the cessation of deformation are given in Tables DR3 and DR4, respectively.

Analysis of oxygen isotopes of pedogenic and lacustrine carbonates and hydrogen isotopes from volcanic rocks suggest that surface elevations during the early Cenozoic were at least 2 km, and in many cases 3 km above sea level. Sources for our presentation of these data in Fig. 1 are given in Table DR5.

Fig. DR3 is a map keyed to the sources given in Tables DR2-DR5.

204

205 **REFERENCES**

206 Arrial, P.-A., and Billen, M.I., 2013, Influence of geometry and eclogitization on oceanic plateau  
207 subduction, *Earth Planet. Sci. Lett.*, v. 363, p. 34-43.

208 Austrheim, H., Eramberta, M., and Engvik, A.K., 1997, Processing of crust in the root of the  
209 Caledonian continental collision zone: the role of eclogitization, *Tectonophys.*, v. 273, p.  
210 129-153.

211 Ayers, W.B., Jr., 1986, Lacustrine and fluvial-deltaic depositional systems, Fort Union  
212 Formation (Paleocene), Powder River Basin, Wyoming and Montana, *AAPG Bull.*, v. 70,  
213 p. 1651–1673.

214 Beaumont, C., Nguyen, M.H., Jamieson, R.A. and Ellis, S., 2006, Crustal flows in large hot  
215 orogens, *Geological Society, London, Special Publications*, 268, p. 91-145.

216 Bishop, G.A., 1985, Fossil decapod crustaceans from the Gammon ferruginous member, Pierre  
217 Shale (Early Campanian), Black Hills, South Dakota, *J. Paleo.*, v. 59, no.3, p. 605-624.

218 Boyd, D.W., and Lillegraven, J.A., 2011, Persistence of the Western Interior Seaway: Historical  
219 background and significance of ichogenus *Rhizocorallium* in Paleocene strata, south  
220 Central Wyoming, *Rocky Mountain Geology*, v. 46, p. 43-69.

221 Cassel, E., J., Brecker, D.O., Henry, C.D., Larson, T.E., and Stockli, D.F., 2014, Profile of a  
222 paleo-orogen: High topography across the present-day Basin and Range from 40 to 23 Ma.  
223 *Geology*, v. 42, no 11, p. 1007-1010.

224 Cather, S.M., 2004, Laramide orogeny in central and northern New Mexico and southern  
225 Colorado, in Mack, G.H., and Giles, K.A., eds., *The geology of New Mexico, A geologic*  
226 *history: New Mexico Geological Society Special Pub. 11*, p. 203-248.

227 Cervený, P.F., 1990, Fission-track Thermochronology of the Wind River Range and Other  
 228 Basement Cored Uplifts in the Rocky Mountain Foreland [Ph.D. dissertation]: Laramie,  
 229 Wyoming, University of Wyoming, 180 p.

230 Coney, P.J., and Harms, T.A., 1984, Cordilleran metamorphic core complexes: Cenozoic  
 231 extensional relics of Mesozoic compression, *Geology*, v. 12, no. 9, p.550-554.

232 Copeland, P., Murphy, M.A., Dupré, W.R., and Lapen, T.J., 2011, Oligocene Laramide  
 233 deformation in southern New Mexico and its implications for Farallon plate geodynamics:  
 234 *Geosphere*, v. 7, p.1–11.

235 Crowell, J.C. 1962, Displacement along the San Andreas fault, California, Geological Society of  
 236 America Special Paper 71, p.1-58. doi: 10.1130/SPE71-p1.

237 Davis, G.A., and Lister, G.S. 1988, Detachment faulting in continental extension; perspectives  
 238 from the southwestern US Cordillera. Geological Society of America Special Papers, 218,  
 239 133-160.

240 De los Santos M.G., Lawton, T.F., Copeland, P., Licht, A., Hall, S.A., 2017,  
 241 Magnetostratigraphy, age and depositional environment of the Lobo Formation, southwest  
 242 New Mexico: Implications for the Laramide orogeny in the southern Rocky Mountains,  
 243 Basin Research, in press

244 Dickinson, W.R., Klute, M.A., Hayes, M.J., Janecke, S.U., Lundin, E.R., McKittrick, M.A., and  
 245 Olivares, M.D., 1988, Paleogeographic and paleotectonic setting of Laramide sedimentary  
 246 basins in the central Rocky Mountain region, *GSA Bull.*, v. 100, p.1023-1039.

247 Dickinson, W.R., 1991, Tectonic setting of faulted Tertiary strata associated with the Catalina  
 248 core complex in southern Arizona, Geological Society of America Special Paper 264, p.1-  
 249 106.

250 Drewes, H., 1981, Tectonics of southeastern Arizona, USGS Prof. Paper 1144, 96 p.

251 Eaton, J. G., 1991, Biostratigraphic framework for the Upper Cretaceous rocks of the  
 252 Kaiparowits Plateau, southern Utah, in Nations, J. D., and Eaton, J. G., eds., Stratigraphy,  
 253 depositional environments, and sedimentary tectonics of the western margin, Cretaceous  
 254 Western Interior Seaway, Geological Society of America Special Paper 260, p. 47-63.

255 Engebretson, D.C., Cox, A., and Thompson, G.A., 1984, Correlation of plate motions with  
 256 continental tectonics: Laramide to Basin-range, Tectonics, v. 3, p.115-119.

257 Fan, M., and Carrapa, B., 2014, Late Cretaceous–early Eocene Laramide uplift, exhumation, and  
 258 basin subsidence in Wyoming: Crustal responses to flat slab subduction: Tectonics, v. 33,  
 259 p. 509–529

260 Fan, M., Heller, P.L., Allen, S.D., and Hought, B.G., 2014, Middle Cenozoic uplift and  
 261 concomitant drying in the central Rocky Mountains and adjacent Great Plains, Geology, v.  
 262 42, no. 6, p. 547–550.

263 Fullsack, P., 1995, An arbitrary Lagrangian-Eulerian formulation for creeping flows and  
 264 applications in tectonic models: Geophys J Int., v. 120, p. 1-23.

265 Gill, J.R. and Cobban, W.A., 1966, The Red Bird section of the Upper Cretaceous Pierre Shale  
 266 in Wyoming, USGS Prof. Paper 393-A, 71 p.

267 Gill, J.R. and Hail, W.J., 1975, Stratigraphic sections across Upper Cretaceous Mancos Shale-  
 268 Mesaverde Group boundary, eastern Utah and western Colorado, USGS Oil and Gas  
 269 Investigation Chart 68.

270 Gill, J.R., Cobban, W.A., and Schultz, L.G., 1972, Stratigraphy and composition of the Sharon  
 271 Springs Member of the Pierre Shale in western Kansas, USGS Professional Paper 728, 50  
 272 p.

273 Goldstrand, P.M., 1994, Tectonic development of Upper Cretaceous to Eocene strata of  
 274 southwestern Utah: GSA Bull., v. 106, p. 145–154.

275 González-León, C. M., Solari, L., Solé, J., Ducea, M.N., Lawton, T.F., Bernal, J.P., Becuar, E.G.,  
 276 Gray, F., Martínez, M.L., Santacruz, R.L., 2011, Stratigraphy, geochronology, and  
 277 geochemistry of the Laramide magmatic arc in north-central Sonora, Mexico. *Geosphere*,  
 278 v. 7, p., 392-1418.

279 Hacker, B.R., Abers, G.A., and Peacock, S.M., 2003, Subduction factory 1. Theoretical  
 280 mineralogy, densities, seismic wave speeds, and H<sub>2</sub>O contents, *J. Geophys. Res.*, v. 108,  
 281 p.2029, doi: 10.2029/2002JB002026.

282 Howard, K.A., and John, B.E., 1987, Crustal extension along a rooted system of imbricate low-  
 283 angle faults: Colorado River extensional corridor, California and Arizona, Geological  
 284 Society, London, Special Publications, 28.1, 299-311.

285 Humphreys, E., Hessler, E., Dueker, K., Farmer, G.L., Erslev, E., and Atwater T., 2003, How  
 286 Laramide-age hydration of North American lithosphere by the Farallon slab controlled  
 287 subsequent activity in the western United States, *Int. Geol. Rev.*, v. 45, p. 575-595.

288 Huntington, K.W., Wernicke, B.P., and Eiler, J.M., 2010, The influence of climate change and  
 289 uplift on Colorado Plateau paleotemperatures from carbonate “clumped isotope”  
 290 thermometry, *Tectonics*, v. 29, p. TC3005, 19 p.

291 Jacques-Ayala, C., Barth, A.P., Wooden, J.L. & Jacobson, C.E. 2009, Provenance and U-Pb  
 292 geochronology of the Upper Cretaceous El Chanate Group, northwest Sonora, Mexico,  
 293 and its tectonic significance. *International Geology Review*, v. 51, p. 1051-1077.

294 Jacques-Ayala, C., 1995, Paleogeography and provenance of the Lower Cretaceous Bisbee  
 295 Group in the Caborca-Santa Ana area, northwestern Sonora, GSA Special Paper, 301, p.

296 79-98.

297 Karato, S.-I. and Wu, P., 1993, Rheology of the upper mantle: A synthesis, *Science*, v. 260, p.

298 771-778.

299 Keith, S.B., and Wilt, J.C., 1986, Laramide orogeny in Arizona and adjacent regions-A strato-

300 tectonic synthesis, in Beatty, B., and Wilkinson, P.A.K., eds., *Frontiers in geology and ore*

301 *deposits of Arizona and the southwest: Arizona Geological Society Digest*, v. 16, p. 502-

302 554.

303 Kelley, S.A., 2005, Low-temperature cooling histories of the Cheyenne Belt and Laramie Peak

304 shear zone, Wyoming, and the Soda Creek–Fish Creek shear zone, Colorado, in Karlstrom,

305 K.E., and Keller, G.R., eds., *The Rocky Mountain Region: An evolving lithosphere:*

306 *American Geophysical Union Geophysical Monograph* v. 54, p. 55–70.

307 Kelley, S.A., 2002, Unroofing of the southern Front Range, Colorado: A view from the Denver

308 Basin, *Rocky Mountain Geology*, v. 37, p. 189–200.

309 Kluth, C.F., and Nelson, S.N., 1988, Age of Dawson Arkose, southwestern Air Force Academy,

310 Colorado, and implications for the uplift history of the Front Range, *The Mountain*

311 *Geologist*, v. 25, p. 29–35.

312 Korenaga, J., and W.W. Sager, 2012, Seismic tomography of Shatsky Rise by adaptive

313 importance sampling, *J. Geophys. Res.*, v. 117: B08102, doi: 10.1029/2012JB009248.

314 Lawton, T.F., 1983, Late Cretaceous fluvial systems and the age of foreland uplifts in central

315 Utah, in Lowell, J.D. ed., *Rocky Mountain foreland basins and uplifts: Denver, Colorado,*

316 *Rocky Mountain Association of Geologists*, p. 181–199.

317 Lehman, T.M., 1991, Sedimentation and tectonism in the Laramide Tornillo Basin of West

318 Texas, *Sed. Geol.*, v. 75, p. 9-28.

319 Lillegraven, J.A., 2015, Late Laramide tectonic fragmentation of the eastern greater Green  
 320 River Basin, Wyoming, *Rocky Mountain Geology*, v. 50, no. 1, p. 30-118.

321 Lisenbee, A.L., and DeWitt, E., 1993, Laramide evolution of the Black Hills uplift, in Snoke,  
 322 A.W., Steidtmann, J.R., and Roberts, S.M., eds., *Geology of Wyoming*, Geological Survey  
 323 of Wyoming Memoir 5, p. 374–412.

324 Lopez, J.L. and Steel, R.J., 2015, Laramide signals and architecture of a widespread fluvial sand  
 325 sheet: Canyon Creek member, southern Wyoming, U.S.A., *J. Sed. Res.*, v. 85, no. 9, p.  
 326 1102-1122.

327 Mederos, S., Tikoff, B., and Bankey, V., 2005, Geometry, timing and continuity of the Rock  
 328 Springs uplift, Wyoming, and Douglas Creek Arch, Colorado: Implications for uplift  
 329 mechanisms in the Rocky Mountain foreland, U.S.A., *Rocky Mountain Geology*, v. 40, p.  
 330 167–191.

331 Mix, H.T., Mulch, A., Kent-Corson, M.L., and Chamberlain, C.P., 2011, Cenozoic migration of  
 332 topography in the North American Cordillera, *Geology*, v. 39, p. 87–90.

333 Molenaar, C.M., 1983, Major depositional cycles and regional correlations of Upper Cretaceous  
 334 rocks, southern Colorado Plateau and adjacent areas, in Reynolds, M.W., and Dolly, E.D.,  
 335 eds., *Mesozoic paleogeography of west central United States: Rocky Mountain  
 336 Paleogeography Symposium 2: Denver, Colorado, Rocky Mountain Section, Society of  
 337 Economic Paleontologists and Mineralogists*, p. 201–223

338 Omar, G.I., Lutz, T.M., and Giegengack, R., 1994, Apatite fission-track evidence for Laramide  
 339 and post-Laramide uplift and anomalous thermal regime at the Beartooth overthrust,  
 340 Montana-Wyoming, p. *GSA Bull.*, v. 106, p. 74–85.

341 Peppe D.J., Evans, D.A.D., and Smirnov, A.V., 2009, *Magnetostratigraphy of the Ludlow*

342 member of the Fort Union Formation (lower Paleocene) in the Williston Basin, North  
 343 Dakota , GSA Bull., v. 121, p. 65–79.

344 Price, J.G., and Henry, C.D., 1984, Stress orientations during Oligocene volcanism in Trans-  
 345 Pecos Texas: Timing the transition from Laramide compression to Basin and Range  
 346 tension, *Geology*, v. 12, p. 238-241.

347 Raynolds, R., G., 2003, Upper Cretaceous and Tertiary stratigraphy of the Denver Basin,  
 348 Colorado, *Rocky Mountain Geology*, v. 37, no. 2, p. 111-134.

349 Tindall, S.E., Storm, L.P., Jenesky, T.A., and Simpson, E.L., 2010, Growth faults in the  
 350 Kaiparowits Basin, Utah, pinpoint initial Laramide deformation in the western Colorado  
 351 Plateau, *Lithosphere*, v. 2, p. 221–231.

352 Tomlinson, D.W., Copeland, P., Murphy, M.A., and Lapen, T.J., 2013, Oligocene shortening in  
 353 the Little Burro Mountains, SW New Mexico, *Rocky Mountain Geology*, v. 48, no. 2, p.  
 354 169-183.

355 Warren, C.J., Beaumont, C., and Jamieson, R.A., 2008, Formation and exhumation of ultra-high-  
 356 pressure rocks during continental collision: role of detachment in the subduction channel,  
 357 *Geochem. Geophys. Geosys.*, v. 9:Q04019, doi: 10.1029/2007GC001839.

358 Wiltschko, D.V., and Dorr, J.A., Jr., 1983, Timing of deformation in overthrust belt and foreland  
 359 of Idaho, Wyoming, and Utah, *AAPG Bull.*, v. 67, p. 1304-1322.

360 Zhang, J., Sager, W.W., and Korenaga, J., 2016, The seismic Moho structure of Shatsky Rise  
 361 oceanic plateau, northwest Pacific Ocean, *Earth Planet. Sci. Lett.*, v. 441, p. 143-154.

362



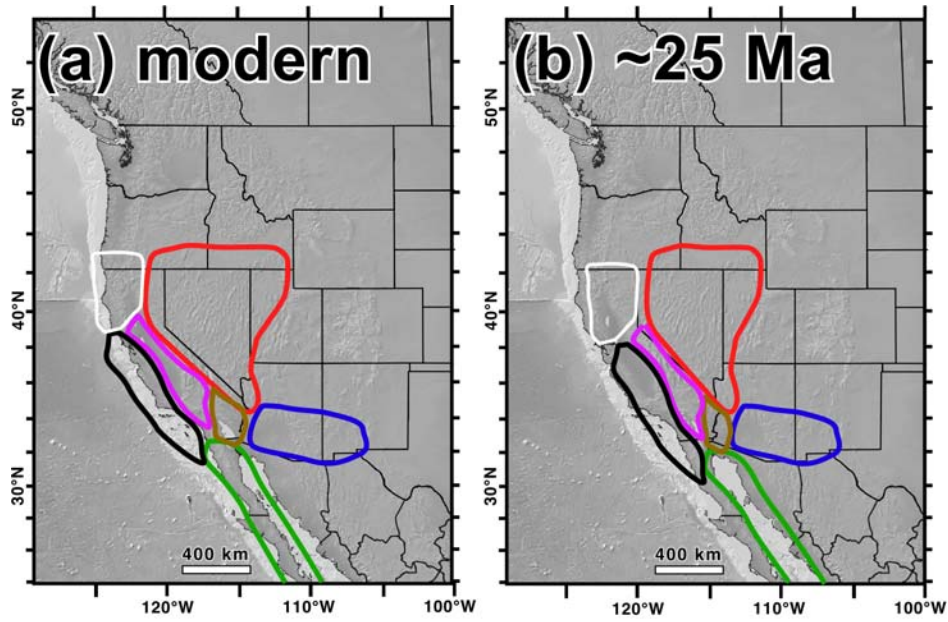

**Figure DR1.** Illustration of procedures of palinspastic reconstruction. (a) Shapes of areas used in reconstruction in their modern orientation, (b) Shapes of areas used in reconstruction after palinspastic reconstruction. See text for details.

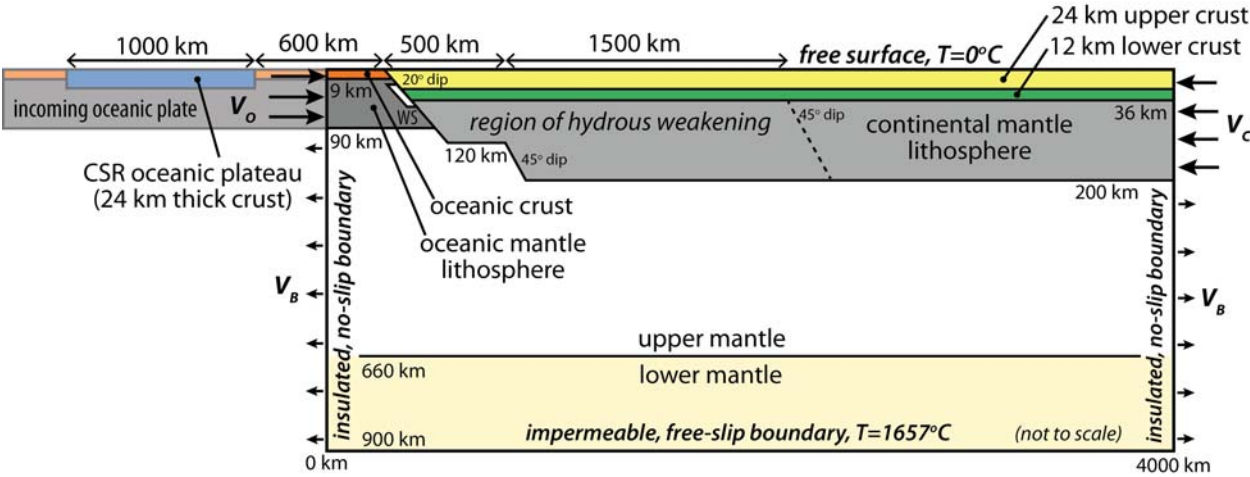

370

371

372

373

374

375

376

377

378

**Figure DR2.** Initial geometry and boundary conditions of the numerical model. The computational domain is within the 4000 km x 900 km rectangle. The domain is divided into 320 Eulerian finite elements horizontally (12.5 km wide) and 116 elements vertically (3 km height in the upper 60 km, 5 km height at 60-260 km depth, 10 km height at 260-660 km depth and 15 km below 660 km depth). A weak seed (WS) between the continental and oceanic plates aids in subduction initiation. This material is subducted with the oceanic plate and does not affect later model evolution.

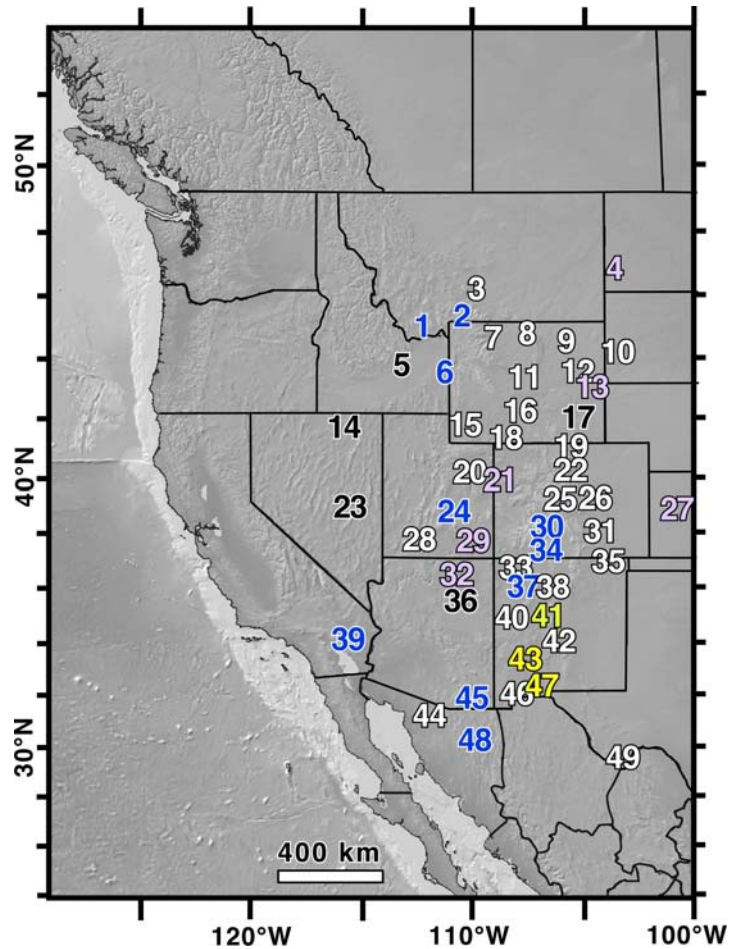

**Figure DR3.** Map of locations mentioned in Tables DR2-DR5. Lavender numerals represent sites with estimates of the youngest marine sedimentation, black numerals represent sites with estimates of the timing of attainment of maximum surface elevation only, blue numerals represent sites with estimates of the timing of initiation of Laramide deformation only; yellow numerals sites represent sites with estimates of the timing of cessation of Laramide deformation only; white numerals sites represent sites with more than one kind of estimate.

## Tables DR1-DR5

**Table DR1.** Material parameters in geodynamic model.

|                                                       | Oceanic crust <sup>a</sup> | Oceanic mantle lithosphere | Continental upper crust | Continental lower crust | Cont. mantle lithosphere | Sublithospheric mantle <sup>b</sup> |
|-------------------------------------------------------|----------------------------|----------------------------|-------------------------|-------------------------|--------------------------|-------------------------------------|
| <b>Plastic rheology<sup>c</sup></b>                   |                            |                            |                         |                         |                          |                                     |
| $c_0$ (MPa)                                           | 0                          | 0                          | 20                      | 0                       | 0                        | 0                                   |
| $\phi_{\text{eff}}$                                   | 15° to 2°                  | 15°                        | 15° to 2°               | 15° to 2°               | 15° to 2°                | 15° to 2°                           |
| <b>Viscous rheology<sup>d</sup></b>                   |                            |                            |                         |                         |                          |                                     |
| $f$                                                   | 0.1, 10 <sup>a</sup>       | 5                          | 5                       | 0.1                     | 10                       | 1, 5 <sup>b</sup>                   |
| $B^*$ (Pa s <sup>1/n</sup> )                          | $1.91 \times 10^5$         | $1.92 \times 10^4$         | $2.92 \times 10^6$      | $1.91 \times 10^5$      | $1.92 \times 10^4$       | $1.92 \times 10^4$                  |
| $n$                                                   | 4.7                        | 3.0                        | 4.0                     | 4.7                     | 3.0                      | 3.0                                 |
| $Q$ (kJ mol <sup>-1</sup> )                           | 485                        | 430                        | 223                     | 485                     | 430                      | 430                                 |
| $V^*$ (cm <sup>3</sup> mol <sup>-1</sup> )            | 0                          | 10                         | 0                       | 0                       | 10                       | 10                                  |
| <b>Thermal parameters</b>                             |                            |                            |                         |                         |                          |                                     |
| $k$ (W m <sup>-1</sup> K <sup>-1</sup> ) <sup>e</sup> | 2.25                       | 2.25                       | 2.25                    | 2.25                    | 2.25                     | 2.25                                |
| $A$ (μW m <sup>-3</sup> )                             | 0                          | 0                          | 1.2, 0.9 <sup>f</sup>   | 0.4, 0.2 <sup>f</sup>   | 0                        | 0                                   |
| $c_p$ (J kg <sup>-1</sup> K <sup>-1</sup> )           | 750                        | 1250                       | 750                     | 1250                    | 1250                     | 1250                                |
| <b>Density<sup>g</sup></b>                            |                            |                            |                         |                         |                          |                                     |
| $\rho_0$ (kg m <sup>-3</sup> )                        | 2950                       | 3250                       | 2800                    | 2900                    | 3250                     | 3250                                |
| $T_0$ (°C)                                            | 500                        | 1340                       | 500                     | 500                     | 1340                     | 1340                                |
| Eclogite $\rho_0$ (kg m <sup>-3</sup> )               | 3450                       | --                         | --                      | --                      | --                       | --                                  |
| Eclogite $T_0$ (°C)                                   | 500                        | --                         | --                      | --                      | --                       | --                                  |
| $\alpha$ (K <sup>-1</sup> )                           | $3.0 \times 10^{-5}$       | $3.0 \times 10^{-5}$       | $3.0 \times 10^{-5}$    | $3.0 \times 10^{-5}$    | $3.0 \times 10^{-5}$     | $3.0 \times 10^{-5}$                |

<sup>a</sup> The CSR crust has the same material parameters as the rest of the oceanic crust, except that the CSR crust is 24 km thick and the rheology of the lower 12 km of CSR crust is 10 times stronger. This is needed to prevent the plateau crust from buoyantly detaching from the slab during subduction.

<sup>b</sup> The sublithospheric mantle is divided into a weak upper mantle (to 660 km depth) and a stronger lower mantle (below 660 km), using different viscous scaling factors ( $f$ ).

<sup>c</sup> Frictional-plastic deformation follows a Drucker-Prager yield criterion:  $J'_2 = c_0 \cos \phi_{\text{eff}} + P \sin \phi_{\text{eff}}$ , where  $c_0$  is the cohesion,  $\phi_{\text{eff}}$  is the effective internal angle of friction, and  $J'_2$  is the square root of the second invariant of the deviatoric stress tensor. Strain softening is included through a linear decrease in  $\phi_{\text{eff}}$  over accumulated strain of 0.5 to 1.5.

<sup>d</sup> The effective viscosity ( $\eta_{\text{eff}}$ ) for viscous deformation is given by:  $\eta_{\text{eff}} = f(B^*) (\dot{\epsilon}_2)^{(1-n)/n} \exp\left(\frac{E^* + PV^*}{nRT}\right)$ , where  $\dot{\epsilon}_2$  is the square root of the second invariant of the strain rate tensor,  $P$  is the total pressure,  $T$  is the temperature,  $f$  is a scaling factor,  $B^*$  is the pre-exponential factor,  $n$  is the stress exponent,  $E^*$  is the activation energy,  $V^*$  is the activation volume and  $R$  is the universal gas constant.

<sup>e</sup> thermal conductivity ( $k$ ) at temperatures less than 1390°C; at higher temperatures, thermal conductivity increases linearly from 2.25 W m<sup>-1</sup> K<sup>-1</sup> at 1390°C to 52.75 W m<sup>-1</sup> K<sup>-1</sup> at 1430°C.

<sup>f</sup> the first  $A$  corresponds to crustal heat production for the 120 km thick lithosphere (Fig. DR4); the second  $A$  is for the 200 km thick lithosphere.

<sup>g</sup> density varies with temperature:  $\rho(T) = \rho_0(1 - \alpha(T - T_0))$ , where  $\rho_0$  is the reference density at temperature  $T_0$  and  $\alpha$  is the volumetric thermal expansion coefficient.

410 **Table DR 2.** Estimates for the age of youngest marine strata

| Location                           | Age of youngest marine strata (Ma) | Type of data  | reference                            | Distance along A-A' in Fig. 1 (km) | Location on Fig. DR3 |
|------------------------------------|------------------------------------|---------------|--------------------------------------|------------------------------------|----------------------|
| San Juan Basin                     | 76                                 | stratigraphic | Cather, 2004                         | 950                                | 33                   |
| Piceance Basin,                    | 79                                 | stratigraphic | Gill and Hail, 1975                  | 1100                               | 21                   |
| Wind River Basin, central WY       | 73                                 | stratigraphic | Dickinson et al., 1988               | 1400                               | 11                   |
| North Park Basin, northern CO      | 75                                 | stratigraphic | Dickinson et al., 1988               | 1500                               | 19                   |
| Middle Park Basin, northern CO     | 73                                 | stratigraphic | Dickinson et al., 1988               | 1430                               | 22                   |
| South Park Basin, northern CO      | 73                                 | stratigraphic | Dickinson et al., 1988               | 1340                               | 25                   |
| Raton Basin, NE NM                 | 72                                 | stratigraphic | Cather, 2004                         | 1240                               | 35                   |
| Powder River Basin, NE WY          | 68                                 | stratigraphic | Dickinson et al., 1988               | 1730                               | 12                   |
| Sierra Blanca Basin, central NM    | 88                                 | stratigraphic | Cather, 2004                         | 980                                | 42                   |
| Gallisto Basin, northern NM        | 84                                 | stratigraphic | Dickinson et al., 1988, Cather, 2004 | 1020                               | 37                   |
| Washakie Basin, southern WY- NW CO | 70                                 | stratigraphic | Dickinson et al., 1988               | 1300                               | 18                   |
| Huerfano Park Basin, southern CO   | 75                                 | stratigraphic | Dickinson et al., 1988               | 1340                               | 31                   |
| Uinta Basin, eastern UT            | 82                                 | stratigraphic | Dickinson et al., 1988               | 1100                               | 20                   |
| Big Bend region, west TX           | 80                                 | stratigraphic | Lehman, 1991                         | 800                                | 49                   |
| Northern Sonora                    | 100                                | stratigraphic | Jacques-Ayala, C., 1995              | 390                                | 44                   |
| Western Kansasa                    | 69                                 | stratigraphic | Gill et al., 1972                    | 1640                               | 27                   |
| Black Hills, SD                    | 70                                 | stratigraphic | Bishop, 1985                         | 1900                               | 10                   |
| Eastern Wyoming                    | 69                                 | stratigraphic | Gill and Cobban, 1966                | 1690                               | 13                   |
| Little Hatchets Mtns, SW NM        | 97                                 | stratigraphic | Clinkscales and Lawton, 2012         | 725                                | 46                   |
| Crazy Mountains                    | 72                                 | stratigraphic | Dickinson et al., 1988               | 1500                               | 3                    |
| Baca Basin                         | 89                                 | stratigraphic | Cather, 2004                         | 860                                | 40                   |
| Carthage Basin                     | 88                                 | stratigraphic | Cather, 2004                         | 920                                | 49                   |
| Big Horn Basin                     | 75                                 | stratigraphic | Dickinson et al., 1988               | 1550                               | 7                    |
| Williston Basin, SW ND             | 64                                 | stratigraphic | Peppe et al., 2009                   | 2050                               | 4                    |
| Hanna Basin                        | 63                                 | stratigraphic | Boyd and Lillegraven, 2011           | 1450                               | 16                   |
| Denver Basin                       | 69                                 | stratigraphic | Raynolds, 2003                       | 1460                               | 26                   |
| Black Mesa Basin                   | 84                                 | stratigraphic | Molenaar, 1983                       | 800                                | 32                   |
| SE Utah                            | 90                                 | stratigraphic | Eaton, 1991                          | 930                                | 29                   |
| N. Kaiparowits Plateau, SW UT      | 84                                 | stratigraphic | Eaton, 1991                          | 725                                | 28                   |

411

412

413 **Table DR3.** Estimates for the time of initiation of Laramide deformation

| Location                             | Approximate time of initiation of Laramide deformation (Ma) | Type of data                     | reference                                                                 | Distance along A-A' in Fig. 1 (km) | Location on Fig. DR3 |
|--------------------------------------|-------------------------------------------------------------|----------------------------------|---------------------------------------------------------------------------|------------------------------------|----------------------|
| NE Sonora                            | 93                                                          | stratigraphic and structural     | González-León, <i>et al.</i> , 2011                                       | 420                                | 48                   |
| NW Sonora                            | 91                                                          | stratigraphic and structural     | Jacques-Ayala <i>et al.</i> , 2009                                        | 390                                | 44                   |
| SE California                        | 85                                                          | structural and geochemical       | Keith and Wilt, 1986                                                      | 320                                | 39                   |
| N. Kaiparowits Plateau, SW UT        | 80                                                          | stratigraphic and structural     | Heller and Liu, 2016; Goldstrand, 1994; Tindall <i>et al.</i> , 2010      | 725                                | 28                   |
| Madison-Gravelly uplift              | 79                                                          | stratigraphic                    | Perry <i>et al.</i> , 1990                                                | 1380                               | 1                    |
| Hanna Basin, central WY              | 79                                                          | stratigraphic                    | Heller and Liu, 2016, Kelly, 2005; Lillegraven, 2015                      | 1450                               | 16                   |
| San Juan Basin, NW NM                | 78                                                          | stratigraphic                    | Heller and Liu, 2016; Cather, 2004                                        | 950                                | 33                   |
| Archuleta Anticlinorium              | 78 - 75                                                     | structural                       | Cather, 2004                                                              | 1100                               | 34                   |
| Crazy Mountains Basin, southern MT   | 77                                                          | stratigraphic                    | Dickinson <i>et al.</i> , 1988                                            | 1500                               | 3                    |
| Green River Basin, SW WY             | 76 - 73                                                     | stratigraphic                    | Heller and Liu, 2016; Mederos <i>et al.</i> , 2005; Lopez and Steel, 2015 | 1220                               | 15                   |
| Ancestral Teton-Gros Ventre uplift   | 73                                                          | structural                       | Wiltshko and Dorr, 1983                                                   | 1350                               | 6                    |
| Nacimiento Uplift                    | ~75                                                         | stratigraphic                    | Cather, 2004                                                              | 1000                               | 37                   |
| Uinta Basin, eastern UT              | 75                                                          | stratigraphic                    | Heller and Liu, 2016, Lawton, 1983                                        | 1100                               | 20                   |
| SE Arizona                           | 80 - 75                                                     | stratigraphic, structural        | Drewes, 1981                                                              | 570                                | 45                   |
| San Rafael Swell, southern Utah      | 73                                                          | stratigraphic                    | Lawton, 1983                                                              | 930                                | 24                   |
| San Juan uplift                      | 72                                                          | structural                       | Cather, 2004                                                              | 1110                               | 30                   |
| Little Hatchet Mountains             | 75                                                          | structural                       | Clinkscales and Lawton, 2012                                              | 725                                | 46                   |
| Raton Basin, NE NM                   | 71                                                          | stratigraphic                    | Cather, 2004                                                              | 1240                               | 35                   |
| Denver Basin, eastern CO             | 71                                                          | stratigraphic, Thermochronologic | Heller and Liu, 2016, Kelley, 2002; Kluth and Nelson, 1988                | 1460                               | 26                   |
| Wind River Basin, central WY         | 70                                                          | stratigraphic                    | Dickinson <i>et al.</i> , 1988                                            | 1400                               | 11                   |
| Big Horn Mountains, northwest WY     | 68                                                          | Thermochronologic                | Cervany, 1990                                                             | 1560                               | 8                    |
| South Park Basin, central CO         | 68                                                          | stratigraphic                    | Dickinson <i>et al.</i> , 1988                                            | 1340                               | 25                   |
| Huerfano Park Basin, southern CO     | 68                                                          | stratigraphic                    | Dickinson <i>et al.</i> , 1988                                            | 1340                               | 31                   |
| South Powder River Basin, eastern WY | 68                                                          | stratigraphic                    | Heller and Liu, 2016                                                      | 1650                               | 12                   |
| Middle Park Basin, northern CO       | 67                                                          | stratigraphic                    | Dickinson <i>et al.</i> , 1988                                            | 1430                               | 22                   |
| Washakie Basin, southern WY-NW CO    | 66                                                          | stratigraphic                    | Dickinson <i>et al.</i> , 1988                                            | 1300                               | 18                   |
| Gallisto Basin, northern NM          | 66                                                          | stratigraphic                    | Dickinson <i>et al.</i> , 1988                                            | 1020                               | 37                   |
| North Powder River Basin, eastern WY | 66                                                          | stratigraphic                    | Heller and Liu, 2016, Ayers, 1986                                         | 1720                               | 12                   |
| North Park Basin, northern CO        | 65                                                          | stratigraphic                    | Dickinson <i>et al.</i> , 1988                                            | 1500                               | 19                   |
| Beartooth Mountains, SW MT           | 61                                                          | Thermochronologic                | Omar <i>et al.</i> , 1994                                                 | 1580                               | 2                    |
| Black Hills, western SD              | 60                                                          | structural                       | Heller and Liu, 2016, Lisenbee and DeWitt, 1993                           | 1830                               | 10                   |

415 **Table DR4.** Estimates for the time of cessation of Laramide deformation

| Location                           | Approximate time of cessation of Laramide deformation (Ma) | Type of data  | reference                                     | Distance along A-A' in Fig. 1 (km) | Location on Fig. DR3 |
|------------------------------------|------------------------------------------------------------|---------------|-----------------------------------------------|------------------------------------|----------------------|
| Crazy Mountains Basin, southern MT | 58 - 55                                                    | stratigraphic | Dickinson et al., 1988                        | 1500                               | 3                    |
| Big Horn Basin, northwest WY       | 52 - 50                                                    | stratigraphic | Dickinson et al., 1988                        | 1550                               | 7                    |
| Wind River Basin, central WY       | 52 - 50                                                    | stratigraphic | Dickinson et al., 1988                        | 1400                               | 11                   |
| San Juan Basin                     | 55-50                                                      | stratigraphic | Cather, 2004                                  | 950                                | 33                   |
| North Park Basin, northern CO      | 52 - 35                                                    | stratigraphic | Dickinson et al., 1988                        | 1500                               | 19                   |
| Middle Park Basin, northern CO     | 52 - 35                                                    | stratigraphic | Dickinson et al., 1988                        | 1430                               | 22                   |
| Florida Mountains, SW NM           | 52-40                                                      | stratigraphic | De los Santos et al., 2017                    | 770                                | 47                   |
| South Park Basin, northern CO      | 52 - 36                                                    | stratigraphic | Dickinson et al., 1988                        | 1340                               | 25                   |
| Raton Basin, NE NM                 | 53-49                                                      | stratigraphic | Cather, 2004                                  | 1240                               | 35                   |
| Powder River Basin, NE WY          | 50 - 35                                                    | stratigraphic | Dickinson et al., 1988                        | 1720                               | 12                   |
| Green River Basin, SW WY           | 48 - 29                                                    | stratigraphic | Dickinson et al., 1988                        | 1220                               | 15                   |
| N. Kaiparowits Plateau, SW UT      | 48-42                                                      | stratigraphic | Goldstrand, 1994                              | 725                                | 28                   |
| Sierra Blanca Basin, central NM    | 41                                                         | stratigraphic | Cather, 2004                                  | 980                                | 41                   |
| Carthage-La Joya Basin, central NM | 39                                                         | stratigraphic | Cather, 2004                                  | 920                                | 42                   |
| Gallisto Basin, northern NM        | 39-36                                                      | stratigraphic | Dickinson et al., 1988; Cather, 2004          | 1020                               | 37                   |
| Washakie Basin, southern WY- NW CO | 38 - 29                                                    | stratigraphic | Dickinson et al., 1988                        | 1300                               | 18                   |
| Huerfano Park Basin, southern CO   | 36 - 35                                                    | stratigraphic | Dickinson et al., 1988                        | 1320                               | 31                   |
| Uinta Basin, eastern UT            | 35 - 29                                                    | stratigraphic | Dickinson et al., 1988                        | 1100                               | 20                   |
| Baca Basin, western NM             | 33                                                         | stratigraphic | Cather, 2004                                  | 860                                | 40                   |
| Big Bend region, west TX           | 32                                                         | structural    | Price and Henry, 1984                         | 800                                | 49                   |
| Silver City region, SW NM          | 29                                                         | structural    | Copeland et al., 2011; Tomlinson et al., 2013 | 710                                | 43                   |

416  
417

418 **Table DR5.** Estimates for the time of attainment of maximum surface elevation.

| Location           | Approximate time of attainment of maximum surface elevation (Ma) | Type of data                                 | reference                                                       | Distance along A-A' in Fig. 1 (km) | Location on Fig. DR3 |
|--------------------|------------------------------------------------------------------|----------------------------------------------|-----------------------------------------------------------------|------------------------------------|----------------------|
| Big Horn Mountains | 57                                                               | O isotopes, stratigraphic, thermochronologic | Fan and Carrapa, 2014                                           | 1620                               | 8                    |
| Washakie Range     | 53                                                               | O isotopes                                   | Fan and Carrapa, 2014                                           | 1290                               | 18                   |
| Uinta Mountains    | 49                                                               | O isotopes                                   | Fan and Carrapa, 2014                                           | 1080                               | 20                   |
| Wind River Range   | 47                                                               | O isotopes                                   | Fan and Carrapa, 2014                                           | 1490                               | 11                   |
| SE Wyoming         | 40                                                               | O isotopes                                   | Fan et al., 2014                                                | 1580                               | 17                   |
| Southern Idaho     | 40                                                               | O isotopes                                   | Chamberlain et al., 2012; Mix et al., 2011                      | 1180                               | 5                    |
| NE Nevada          | 37                                                               | O isotopes                                   | Chamberlain et al., 2012; Mix et al., 2011                      | 820                                | 14                   |
| Southern Nevada    | 30                                                               | O isotopes                                   | Chamberlain et al., 2012; Mix et al., 2011, Cassel et al., 2014 | 650                                | 23                   |
| NE Arizona         | 20                                                               | O isotopes                                   | Huntington et al., 2010                                         | 720                                | 36                   |
